# Supplementary material
Source: PubMed Central journal article supplement (PMC2711311)
Supplement: mmc1.pdf [file mmc1.pdf]

Biophysical Journal, Volume 97

**Supporting Material**

**Recoil After Severing Reveals Stress Fiber Contraction Mechanisms**

Matthew R. Stachowiak and Ben O'Shaughnessy

# SUPPORTING MATERIAL

## Movie S1

Recoil of a severed stress fiber with Table 1 parameter values, as predicted by our model (numerical solution of Eq. 1). Sequential sarcomere collapse from the severed end results in a growing collapsed cap. In active (collapsed) sarcomeres the myosin regions are depicted orange (dark gray) and  $\alpha$ -actinin regions are depicted green (light gray). Focal adhesion shown black.

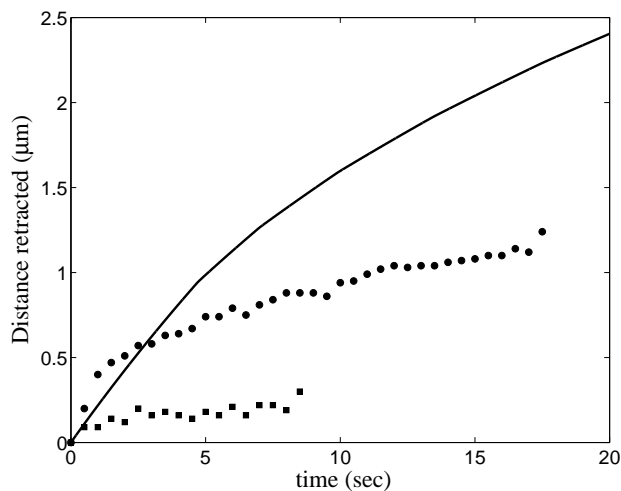

Figure S1: Effect of inhibition of myosin phosphorylation on SF recoil. Circles: ROCK inhibition, from Kumar et al. (9). Squares: MLCK inhibition, from Kumar et al. (9). Solid line: Model prediction with myosin stall force  $f_s = 0$ . Numerical solution of Eq. 1, all other parameters from Table 1.

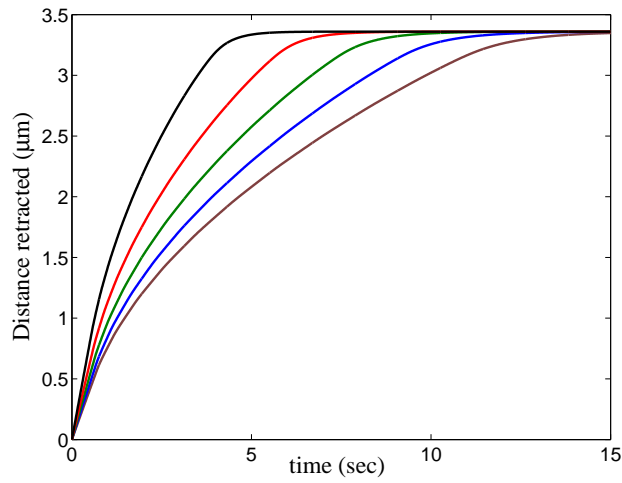

Figure S2: Predicted recoil of severed SFs with initial sarcomere lengths  $x_{\text{sarc}}^0 = 0.6 \mu\text{m}$  (*black*),  $0.9 \mu\text{m}$  (*red*),  $1.2 \mu\text{m}$  (*green*),  $1.5 \mu\text{m}$  (*blue*) and  $1.8 \mu\text{m}$  (*brown*). The external drag coefficient was assumed proportional to sarcomere length ( $\nu_{\text{ext}} \sim x_{\text{sarc}}^0$ ), with  $\nu_{\text{ext}} = 5.3 \text{ pN}\cdot\text{s}/\mu\text{m}$  when  $x_{\text{sarc}}^0 = 0.9 \mu\text{m}$ . All other parameters from Table 1. Numerical solutions of Eq. 1.
